# Supplementary material
Source: PubMed Central journal article supplement (PMC4098875)

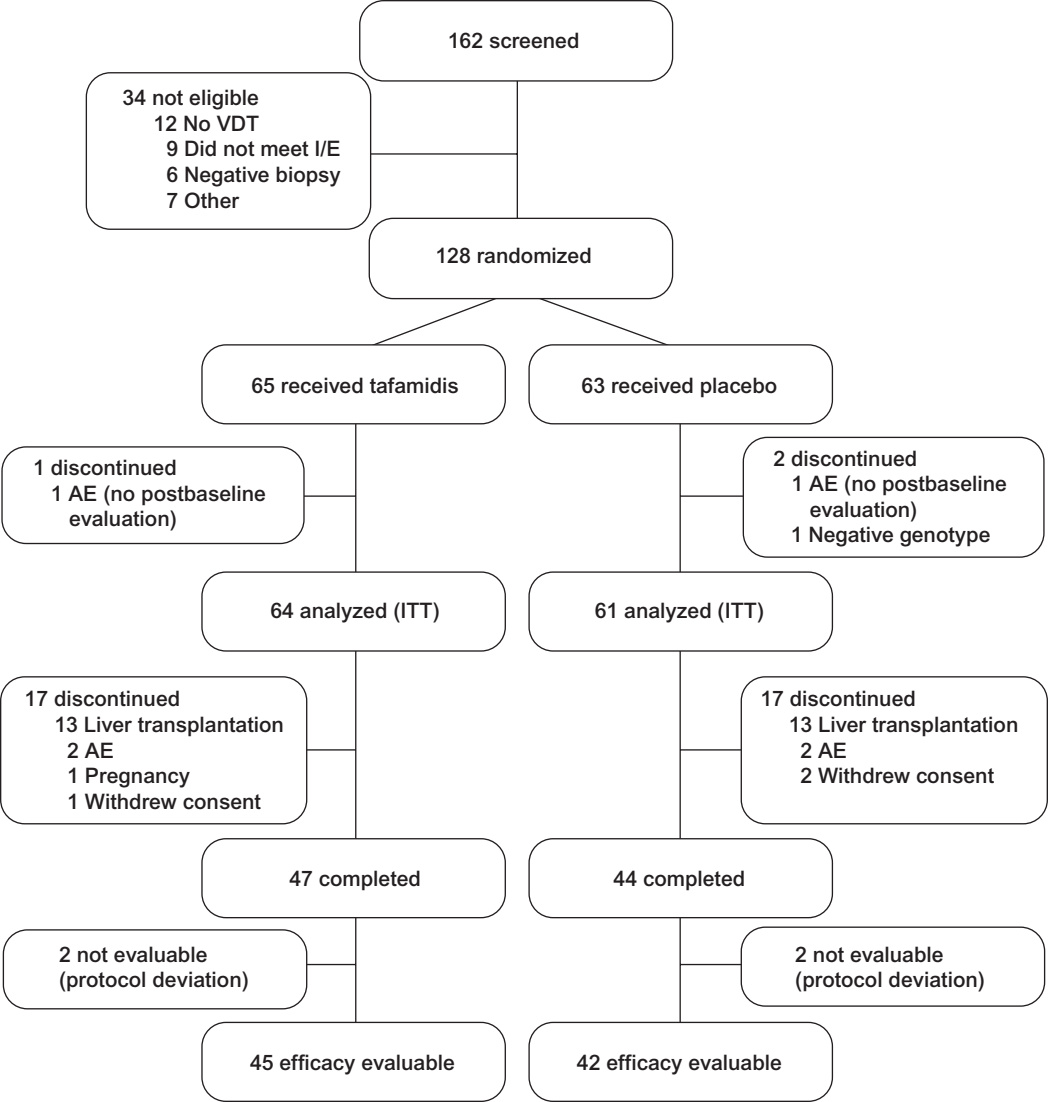

Supplement: supp_WNL.0b013e3182661eb1_WNL204045-412197_Figure_e-1.pdf [file supp_WNL.0b013e3182661eb1_WNL204045-412197_Figure_e-1.pdf]
